# Supplementary material for: Evaluation of task sharing as a workforce optimization strategy in pediatric oncology
Source: Frontiers journal article supplement (doi:10.3389/fonc.2025.1560208), 2025-04-28
Supplement: Image_1.pdf [file Image_1.pdf]

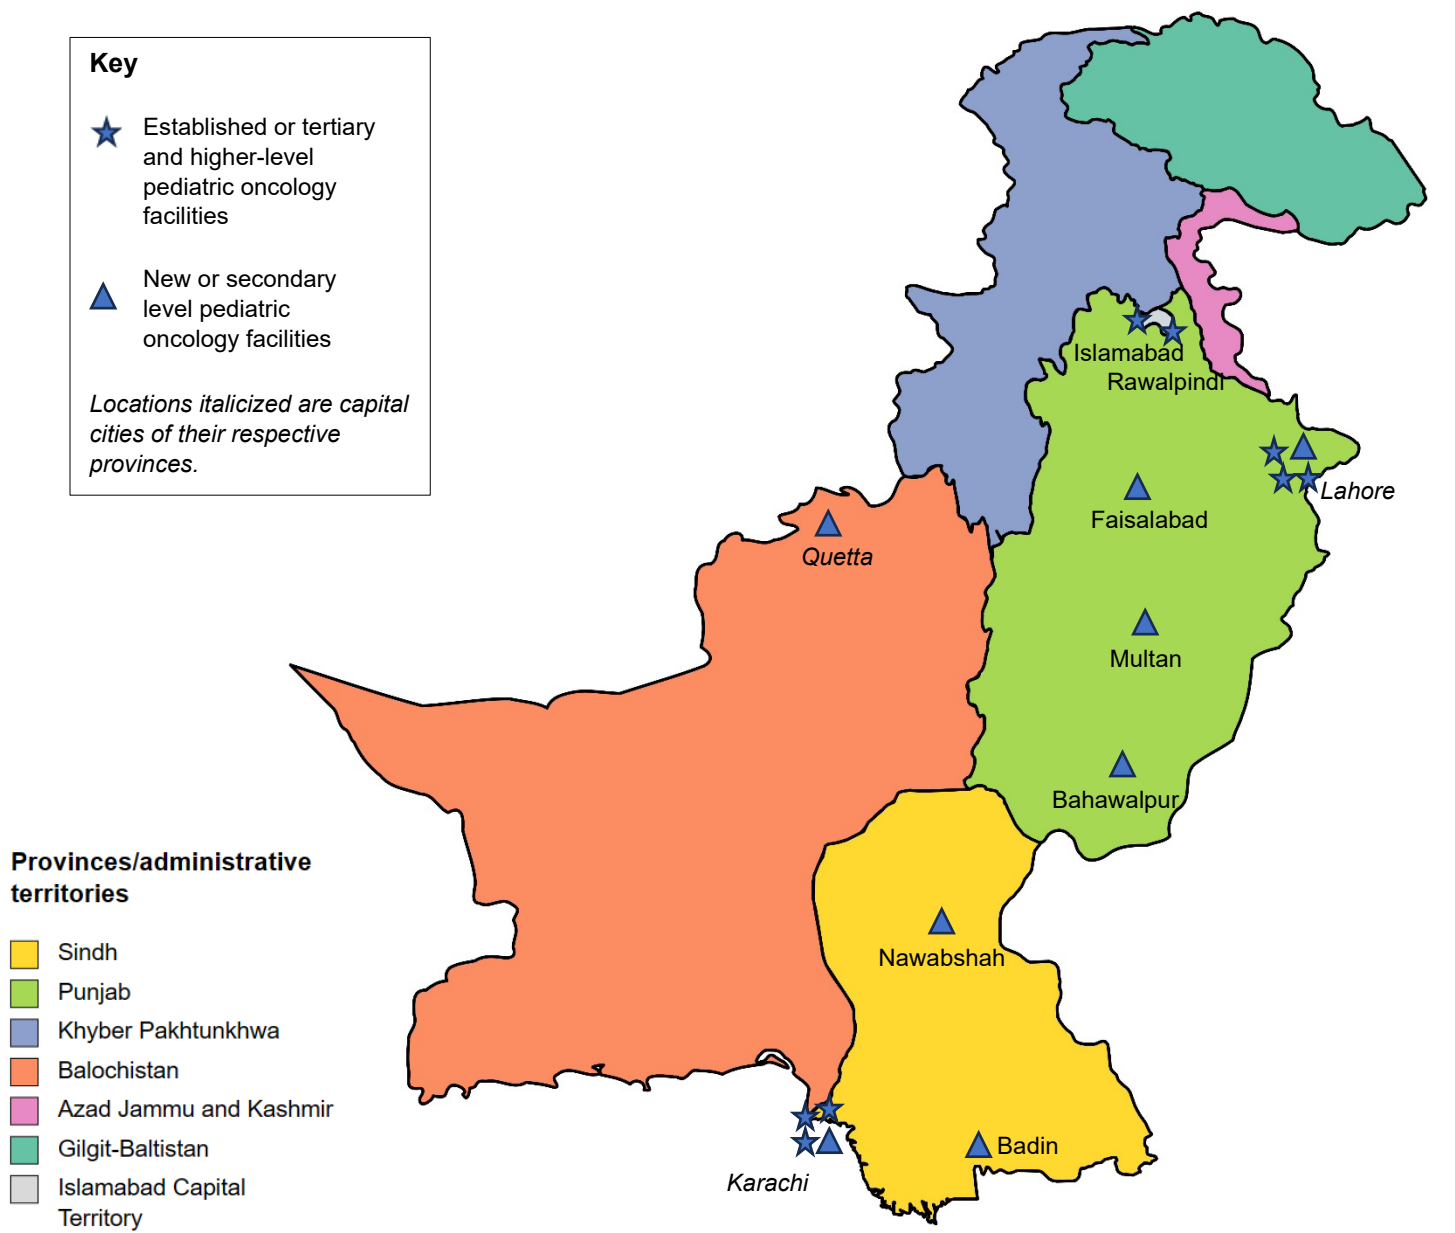

Created with mapchart.net

**Supplementary Figure S1: Map of Pakistan with locations (cities) of participating institutions**
